# Supplementary material for: Piecewise linear approximation of protein structures using the principle of minimum message length
Source: Oxford University Press journal article supplement (doi:10.1093/bioinformatics/btr240), 2011-06-14
Supplement: bioinformatics_27_13_i43_s1.zip [file bioinformatics_27_13_i43_s1.zip]

Archive with 1 entries (1 files):
- Konagurthu_202_sup.pdf
